# Supplementary material for: Galectin-3 is Associated with Cardiovascular Events in Post-Acute Coronary Syndrome Patients with Type-2 Diabetes
Source: PubMed Central journal article supplement (PMC7230213; doi:10.3390/jcm9041105), 2020-04-13
Supplement: jcm-09-01105-s001.pdf [file jcm-09-01105-s001.pdf]

Appendix A

Supplemental Table 1.

Akaike's information criterion (AIC) values for the incidence of acute ischemic events, heart failure or death in non diabetic or diabetic patients adding to the Model 1 the effect of the different biomarkers (NT-proBNP, MCP-1 and Gal-3).

|                             |         |
|-----------------------------|---------|
| No diabetic Patients        | AIC     |
| Model 1                     | 1369.41 |
| Model 1 + NT-proBNP         | 1365.55 |
| Model 1 + MCP-1             | 1344.52 |
| Model 1 + NT-proBNP + MCP-1 | 1339.85 |
|                             |         |
| Diabetic Patients           |         |
| Model 1                     | 525.59  |
| Model 1 + Gal-3             | 521.83  |

Model 1: Adjusted by age, gender, smoking status, hypertension, body mass index, and low-density lipoprotein, high-density lipoprotein, and triglyceride plasma levels, history of cerebrovascular events, ejection fraction <40%, or atrial fibrillation; glomerular filtration rate assessed by Chronic Kidney Disease Epidemiology Collaboration method <60, high-sensitivity C-reactive protein, therapy with acetylsalicylic acid, antiP2Y12, anticoagulants, statins, angiotensin-converting enzyme inhibitors, angiotensin receptor blockers (ARB), anti-aldosterone,  $\beta$ -blockers, nitrates and/or nitroglycerin, diuretic and, type of last acute coronary event or existence of complete revascularization at the event. In diabetic patients, model 1 also included therapy with insulin or oral antidiabetic drugs.

Supplemental Table 2.

Cox proportional hazards model for the incidence of acute ischemic events, heart failure or death in diabetic-hypertensive patients

| Variable                           | Model 1          | Model 2          |
|------------------------------------|------------------|------------------|
|                                    | HR (95% CI)      | HR (95% CI)      |
| Age, years                         | 1.04 (0.99-1.08) | 1.04 (1.00-1.08) |
| Sex, male                          | 0.34 (0.14-0.84) | 0.42 (0.17-1.08) |
| Smoker, yes                        | 2.43 (0.90-6.58) | 3.30 (1.10-9.90) |
| Body mass index, kg/m <sup>2</sup> | 0.99 (0.97-1.01) | 0.99 (0.97-1.01) |
| History of CVE, yes                | 7.12 (1.58-32.1) | 6.39 (1.28-32.0) |
| Ejection fraction <40%, yes        | 0.58 (0.23-1.46) | 0.62 (0.24-1.59) |
| Atrial Fibrillation, yes           | 2.76 (0.79-9.61) | 3.01 (0.80-11.3) |
| Acute myocardial infarction, yes   | 1.31 (0.61-2.85) | 1.24 (0.57-2.70) |
| Complete Revascularization         | 0.87 (0.43-1.76) | 1.02 (0.50-2.08) |

|                                        |                  |                  |
|----------------------------------------|------------------|------------------|
| LDL-c, mg/dL                           | 1.00 (0.98-1.01) | 1.00 (0.98-1.01) |
| HDL-c, mg/dL                           | 1.02 (0.98-1.06) | 1.02 (0.98-1.06) |
| Triglycerides, mg/dL                   | 1.00 (1.00-1.01) | 1.00 (1.00-1.01) |
| CKD-EPI <60 mL/min/1.73 m <sup>2</sup> | 0.91 (0.41-2.01) | 0.82 (0.36-1.89) |
| Acetylsalicylic acid, yes              | 0.65 (0.14-2.98) | 0.88 (0.19-4.14) |
| AntiP2Y12, yes                         | 0.42 (0.19-0.93) | 0.44 (0.19-1.01) |
| Anticoagulants, yes                    | 2.45 (0.59-10.2) | 2.54 (0.57-11.3) |
| Statins, yes                           | 0.31 (0.10-0.94) | 0.32 (0.09-1.13) |
| ACE inhibitors, yes                    | 0.48 (0.21-1.14) | 0.50 (0.20-1.24) |
| ARB, yes                               | 0.85 (0.32-2.23) | 0.72 (0.25-2.03) |
| Anti-aldosterone, yes                  | 2.64 (0.92-7.55) | 2.15 (0.71-6.50) |
| β-Blockers, yes                        | 1.14 (0.51-2.54) | 1.05 (0.47-2.34) |
| Nitrates, yes                          | 1.77 (0.80-3.94) | 1.68 (0.75-3.78) |
| Diuretics, yes                         | 1.07 (0.51-2.22) | 0.94 (0.42-2.10) |
| Insulin, yes                           | 2.15 (1.05-4.42) | 2.26 (1.03-4.95) |
| Oral antidiabetic drugs, yes           | 1.00 (0.46-2.16) | 1.07 (0.47-2.46) |
| Hs-CRP, mg/L                           | 0.98 (0.94-1.02) | 0.97 (0.92-1.02) |
| NT-proBNP, 1-SD                        | -----            | 1.01 (0.76-1.36) |
| MCP-1, 1-SD                            | -----            | 0.90 (0.57-1.42) |
| Gal-3, 1-SD                            | -----            | 1.78 (1.19-2.68) |
| Hs-cTnT, 1-SD                          | -----            | 0.93 (0.78-1.10) |

Model 1: Adjusted by age, gender, smoking status, hypertension, body mass index, and low-density lipoprotein, high-density lipoprotein, and triglyceride plasma levels, history of cerebrovascular events, ejection fraction <40%, or atrial fibrillation; glomerular filtration rate assessed by Chronic Kidney Disease Epidemiology Collaboration method <60, high-sensitivity C-reactive protein, therapy with acetylsalicylic acid, antiP2Y12, anticoagulants, statins, angiotensin-converting enzyme inhibitors, angiotensin receptor blockers (ARB), anti-aldosterone, β-blockers, nitrates and/or nitroglycerin, diuretic and, type of last acute coronary event or existence of complete revascularization at the event. In diabetic patients, model 1 also included therapy with insulin or oral antidiabetic drugs.

Model 2: risk adjusted for factors in model 1 and NT-proBNP, MCP-1, galectin-3 and Hs-cTnT.
